# Supplementary material for: Observation of unexpected uniaxial magnetic anisotropy in La 2/3 Sr 1/3 MnO 3 films by a BaTiO 3 overlayer in an artificial multiferroic bilayer
Source: publisher site journal article supplement (doi:10.3762/bjnano.11.51), 2020-04-16
Supplement: Additional file 1 [file 2190-4286-11-51-S1.pdf]

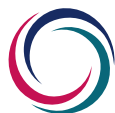

## Supporting Information

for

### **Observation of unexpected uniaxial magnetic anisotropy in $\text{La}_{2/3}\text{Sr}_{1/3}\text{MnO}_3$ films by a $\text{BaTiO}_3$ overlayer in an artificial multiferroic bilayer**

John E. Ordóñez, Lorena Marín, Luis A. Rodríguez, Pedro A. Algarabel, José A. Pardo, Roger Guzmán, Luis Morellón, César Magén, Etienne Snoeck, María E. Gómez and Manuel R. Ibarra

*Beilstein J. Nanotechnol.* **2020**, *11*, 651–661. doi:10.3762/bjnano.11.51

## Additional figures

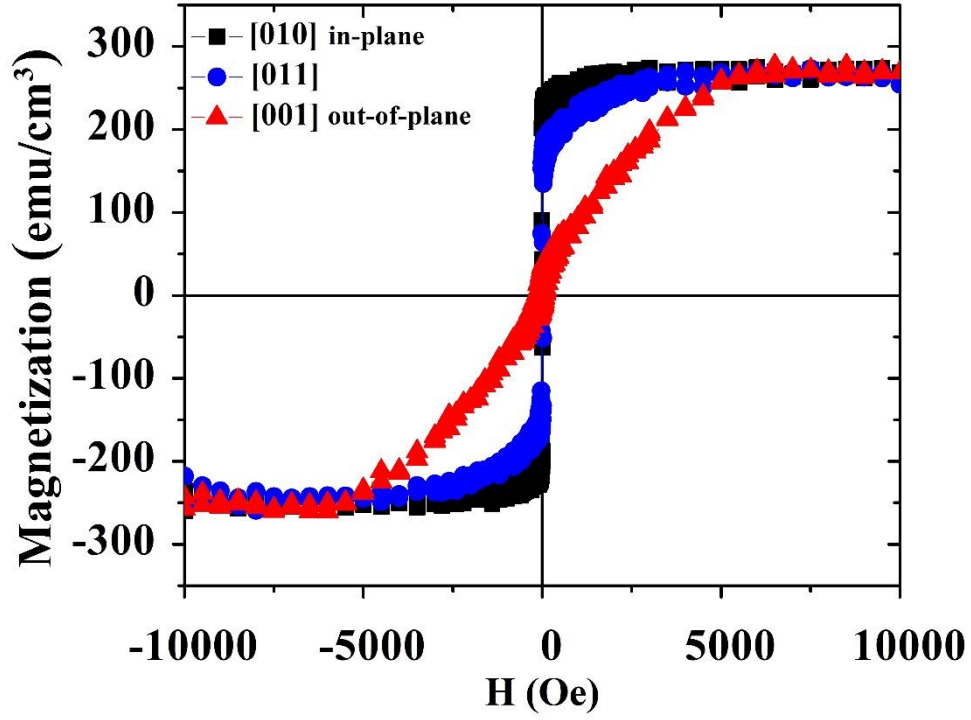

**Figure S1:** Magnetization hysteresis loops performed in the BTO/LSMO/STO bilayer to prove that the magnetization easy axis has an in-plane orientation.

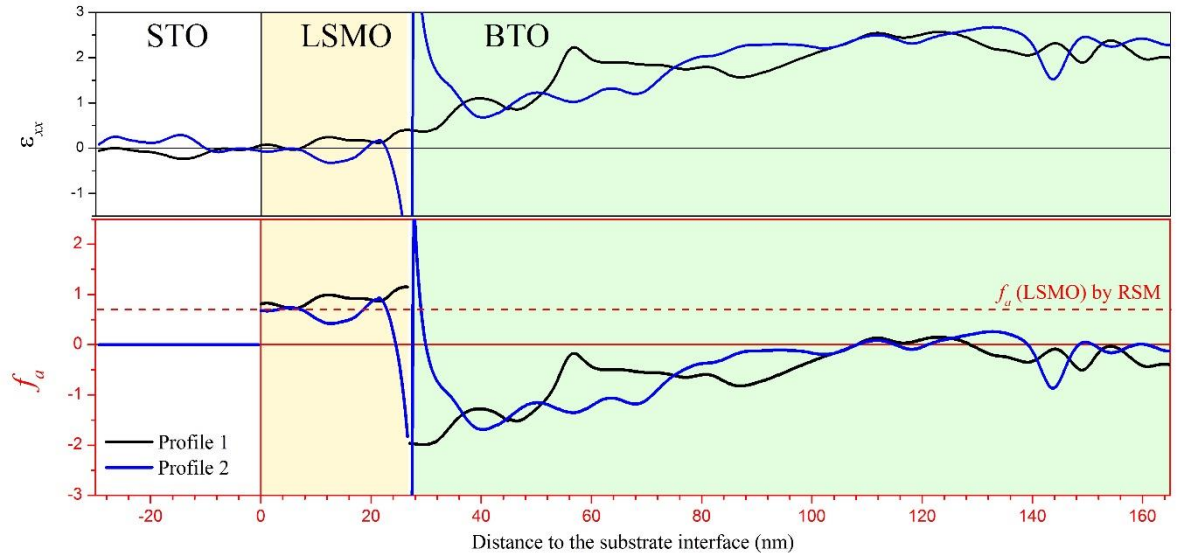

**Figure S2:** In-plane [ $\epsilon_{xx}$  and  $f_a$ ] vertical strain profiles that cover the entire thickness of the BTO layer.
